# Supplementary material
Source: PubMed Central journal article supplement (PMC6003781)
Supplement: NIHMS945347-supplement-1.pdf [file NIHMS945347-supplement-1.pdf]

**Solid-State NMR of Membranous <sup>13</sup>C-Labeled Cholesterol**

Lisa A. Della Ripa,<sup>a</sup> Zoe A. Petros,<sup>a,2</sup> Alex G. Cioffi,<sup>b,3</sup> Dennis W. Piehl,<sup>b</sup> Joseph M. Courtney,<sup>a,1</sup>  
Martin D. Burke,<sup>a,b,d,\*</sup> Chad M. Rienstra<sup>a,b,c,\*</sup>

<sup>a</sup>Department of Chemistry, University of Illinois at Urbana-Champaign, Urbana, IL, USA;

<sup>b</sup>Department of Biochemistry, University of Illinois at Urbana-Champaign, Urbana, IL, USA;

<sup>c</sup>Center for Biophysics and Computational Biology, University of Illinois at Urbana-Champaign, Urbana, IL, USA;

<sup>d</sup>Carle-Illinois College of Medicine, University of Illinois at Urbana-Champaign, Champaign, IL 61820, USA.

<sup>1</sup> Current address: National Institutes of Health, Bethesda, MD 20892, USA

<sup>2</sup> Current address: University of Illinois at Chicago, Chicago, IL 60607, USA

<sup>3</sup> Current address: University of California, Berkeley, Berkeley, CA 94820, USA

\* - Co-corresponding authors: rienstra@illinois.edu, mdburke@illinois.edu

|                                                        |    |
|--------------------------------------------------------|----|
| <i>Dipolar Spectra</i> .....                           | S2 |
| <i>Order Parameters</i> .....                          | S3 |
| <i><sup>13</sup>C-labeled populations of C13</i> ..... | S4 |

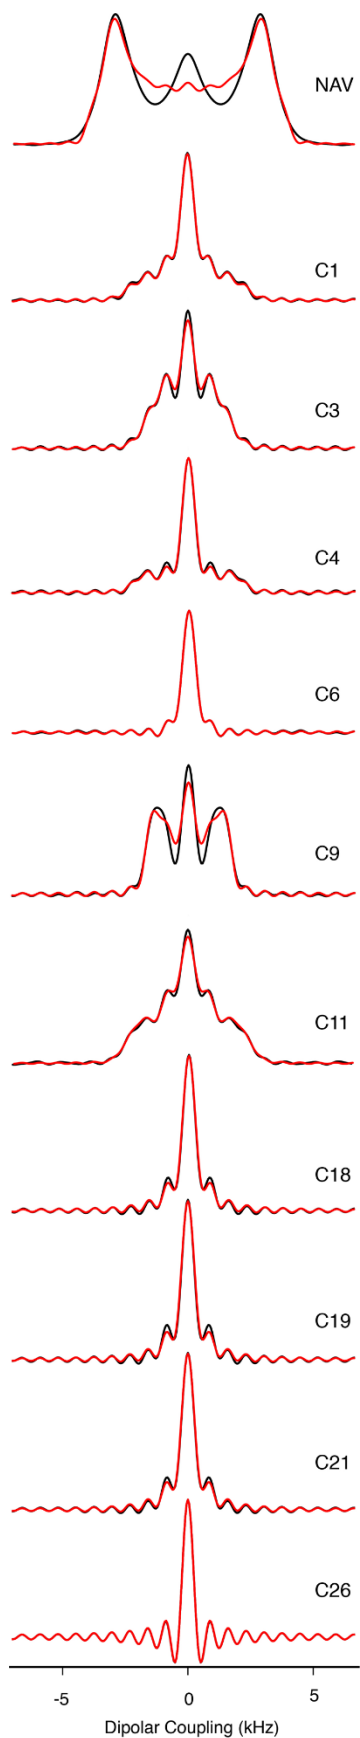

**Figure 1S: Representative Dipolar Coupling Spectra**

Experimental (black) and simulated (red)  $^1\text{H}$ - $^{13}\text{C}$  dipolar coupling line shapes, acquired at 600 MHz using direct  $^1\text{H}$ - $^{13}\text{C}$  polarization and the  $\text{R}48_3^{18}$ -symmetry recoupling sequence. The line shape for NAV (rigid lattice standard) is shown at the top.

**Table 1S: Order Parameters from R48<sub>3</sub><sup>18</sup> 2D experiments**

Average order parameters for various <sup>1</sup>H-<sup>13</sup>C sites along cholesterol including standard deviation. The order parameters are calculated from both DP and CP R48<sub>3</sub><sup>18</sup> experiments. Our measured order parameters are compared to plotted values ( $\pm 0.03$ ) reported by Ferreira et al. in Figure 5D [28]. Note that for CH<sub>2</sub> groups, previous measurements report the largest of the two values.

| Site       | Average Order Parameter | Standard Deviation | Order Parameters from Ferreira et al. [28] |
|------------|-------------------------|--------------------|--------------------------------------------|
| <b>1a</b>  | 0.26                    | 0.05               | -                                          |
| <b>1b</b>  | 0.39                    | 0.07               | 0.38                                       |
| <b>3</b>   | 0.38                    | 0.03               | 0.39                                       |
| <b>4a</b>  | 0.42                    | 0.01               | 0.35                                       |
| <b>4b</b>  | 0.25                    | 0.04               | -                                          |
| <b>6</b>   | 0.12                    | 0.01               | -                                          |
| <b>9</b>   | 0.47                    | 0.01               | 0.44                                       |
| <b>11a</b> | 0.43                    | 0.07               | 0.45                                       |
| <b>11b</b> | 0.27                    | 0.07               | -                                          |
| <b>18</b>  | 0.21                    | 0.01               | 0.12                                       |
| <b>19</b>  | 0.20                    | 0.01               | 0.14                                       |
| <b>21</b>  | 0.18                    | 0.02               | 0.14                                       |
| <b>26</b>  | 0.03                    | 0.01               | -                                          |
| <b>27</b>  | 0.03                    | 0.01               | -                                          |

<sup>13</sup>C-labeled isotopomers of C13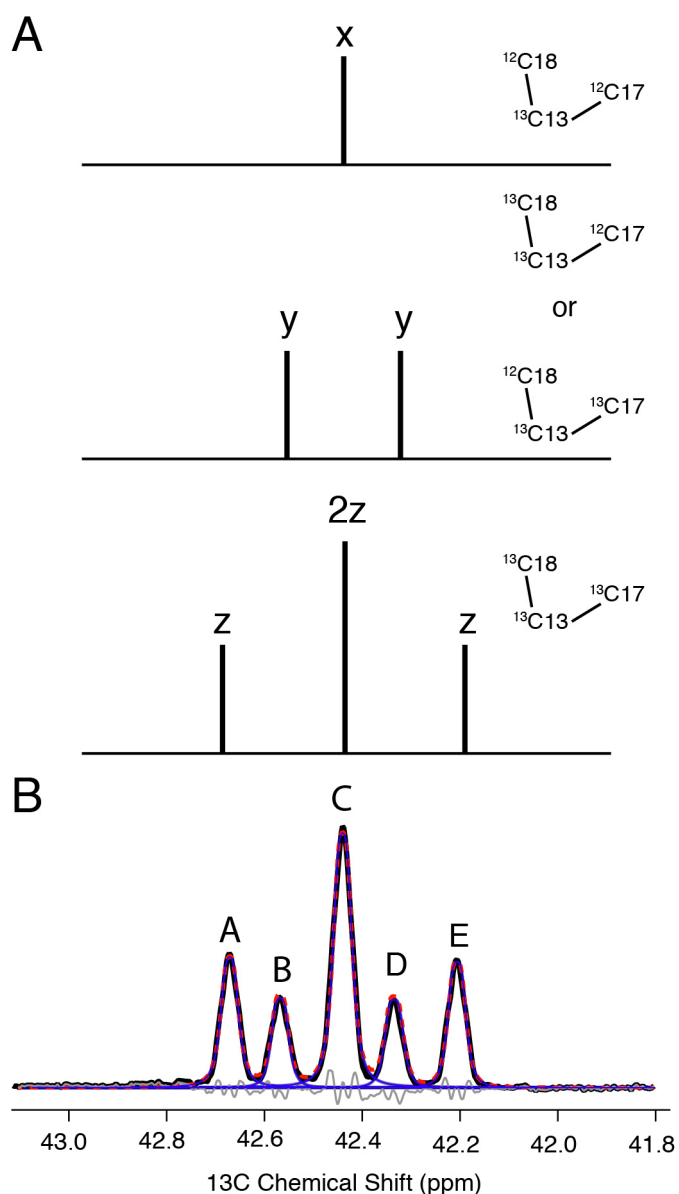

**Figure 2S: Multiplet Structure and Analysis of C13**

A) Sum of multiplets from various C13 populations resulting in the B) observed multiplet, analyzed by global spectral deconvolution. The experimental data is shown in black, the peaks A-E are drawn in blue, and the sum of the fits are represented by the dotted red line. The residual between the experimental (black) and the sum (dotted red) is shown in grey.

The C13 multiplet from Figure 5D from the main text was used to determine the various <sup>13</sup>C-labeled populations of C13. As depicted in Figure 2S below, Peaks B and D represent the splitting which occurs when a labeled C13 is next to either a labeled C17 or C18. Peaks A and E occur when a labeled C13 is next to both a labeled C17 and a C18 molecule. The overall multiplet structure can be represented as the sum of the possible multiplets which occur, shown in part A of Fig 2S. The middle peak C is a sum of  $2z + x$ . Where  $x$  represents the amount of labeled C13 next to both <sup>12</sup>C C17 and <sup>12</sup>C C18. The areas of the peaks were determined using MestreNova's Select Line Fitting Region(s) tool. The breakdown of the analysis is demonstrated below in Table S2. The grey line in Figure 2S represent the residual between the data and the sum (dotted red) of the line fitting (blue) of each peak.

Thus, the following correlations are:

$$C = x = 2z$$

$$B, D = y$$

$$A, E = z$$

**Table S2: Integration values of peaks A-E shown in Figure 2S.**

| Peak | Area    |
|------|---------|
| A    | 14118.3 |
| B    | 8702.7  |
| C    | 28690.6 |
| D    | 8941.7  |
| E    | 12674.1 |

It was then possible to solve for the various populations, in which 3% of the population C13 is not near any labeled C17 and C18, 24% of the population C13 is connected to either a labeled C17 or C18, and 73% of C13 is connected to both a labeled C17 and C18 atoms.
